# Supplementary material for: Psychological Outcomes and Quality of Life of Fibromyalgia Patients with Vitamin D Supplementation—A Meta-Analysis
Source: MDPI journal article supplement (doi:10.3390/jcm12072750), 2023-04-06
Supplement: s1 [file s1]

**Supplementary Table S1.** Baseline and final serum vitamin D level of the included studies

| Author       | Year | Country | Study design | Participants (N) | Dose of Vitamin D | Duration | Baseline serum 25 (OH) D level (ng/ml) in treatment group | Baseline serum 25 (OH) D level (ng/ml) in control group | Final serum 25 (OH) D level (ng/ml) in treatment group | Final serum 25 (OH) D level (ng/ml) in control group | Presence of biological flaws |
|--------------|------|---------|--------------|------------------|-------------------|----------|-----------------------------------------------------------|---------------------------------------------------------|--------------------------------------------------------|------------------------------------------------------|------------------------------|
|              |      |         |              | Tx/ Placebo      |                   | Weeks    | Mean $\pm$ SD                                             | Mean $\pm$ SD                                           | Mean $\pm$ SD                                          | Mean $\pm$ SD                                        | N/Y                          |
| Warner       | 2008 | USA     | RCT          | 22/20            | 50000 IU/ week    | 12       | 16.8 $\pm$ 2.9                                            | 15.9 $\pm$ 3.6                                          | 31.2 $\pm$ 6.2                                         | 19.3 $\pm$ 6.5                                       | N                            |
| Arvold       | 2009 | USA     | RCT          | 48/42            | 50000 IU/ week    | 8        | 17.9 $\pm$ 3.5                                            | 18.1 $\pm$ 4.0                                          | 45 $\pm$ 12                                            | 21.5 $\pm$ 5.5                                       | N                            |
| Wepner       | 2014 | Austria | RCT          | 15/15            | 50000 IU/ week    | 20       | 19 $\pm$ 5.91                                             | 20.89 $\pm$ 6.27                                        | 51 $\pm$ 20.6                                          | 28.2 $\pm$ 12.4                                      | N                            |
| Knutsen      | 2014 | Norway  | RCT          | 144/71           | 1000 IU/ day      | 16       | 10.8 $\pm$ 6                                              | 10.8 $\pm$ 6                                            | 20.8 $\pm$ 8.8                                         | 10 $\pm$ 4.8                                         | N                            |
| Yilmaz       | 2016 | Turkey  | Prospective  | 58/0             | 50000 IU/ week    | 12       | 10.6 $\pm$ 5.1                                            | NA                                                      | 46.5 $\pm$ 24                                          | NA                                                   | N                            |
| Dogru        | 2017 | Turkey  | Prospective  | 70/0             | 50000 IU/ week    | 12       | NA                                                        | NA                                                      | NA                                                     | NA                                                   | Y                            |
| Mirzaei      | 2018 | Iran    | RCT          | 37/37            | 50000 IU/ week    | 8        | 11.4 $\pm$ 6.5                                            | 13.4 $\pm$ 7.3                                          | 33.5 $\pm$ 12.2                                        | 13.3 $\pm$ 7.2                                       | N                            |
| Lozano-Plata | 2020 | México  | RCT          | 39/40            | 50000 IU/ week    | 12       | 20.1 $\pm$ 14.5                                           | 12.6 $\pm$ 13.4                                         | 51.1 $\pm$ 16.5                                        | 20.8 $\pm$ 7.9                                       | N                            |

Abbreviations: Tx= Treatment; SD= Standard Deviation; RCT= Randomized controlled trial; N= No, Y= Yes
