# Supplementary material for: Psychological Outcomes and Quality of Life of Fibromyalgia Patients with Vitamin D Supplementation—A Meta-Analysis
Source: MDPI journal article supplement (doi:10.3390/jcm12072750), 2023-04-06
Supplement: s1 [file s1]

**Supplementary Table S2.** Reasons for exclusion of the articles

| First Author / Publication Year | Journal                                | Title                                                                                                                                               | Reason for exclusion           |
|---------------------------------|----------------------------------------|-----------------------------------------------------------------------------------------------------------------------------------------------------|--------------------------------|
| Abou-Raya et al., 2014          | Annals of the Rheumatic Diseases       | Efficacy of vitamin D supplementation in the treatment of fibromyalgia: Randomized controlled trial                                                 | Meeting Abstract               |
| Al-Allaf et al., 2002           | Journal of Bone and Mineral Research   | Fibromyalgia, bone density and vitamin D deficiency                                                                                                 | Not RCT/cohort study           |
| Al-Allaf et al., 2003           | Annals of the Rheumatic Diseases       | Fibromyalgia, bone density and vitamin D deficiency                                                                                                 | Meeting Abstract               |
| Al-Dabbagh et al., 2012         | Saudi Medical Journal                  | The relation between vitamin D deficiency and fibromyalgia syndrome                                                                                 | Editorial                      |
| Aldaoseri et al., 2020          | Egyptian Rheumatologist                | Vitamin D deficiency and treatment in Iraqi patients with primary fibromyalgia syndrome                                                             | No VAS, FIQ, BDI, SF-36 scores |
| Ali et al., 2022                | SN Comprehensive Clinical Medicine     | Prevalence of Vitamin D Deficiency and Its Relationship with Clinical Outcomes in Patients with Fibromyalgia: A Systematic Review of the Literature | Review article                 |
| Balkarli et al., 2016           | Annals of the Rheumatic Diseases       | Haplotypes of vitamin d receptor gene: Both risky and protective for fibromyalgia (FMS)                                                             | Gene study                     |
| Block et al., 2004              | Mayo Clinic Proceedings                | Vitamin D deficiency is not associated with nonspecific musculoskeletal pain syndromes including fibromyalgia                                       | Letter to editor               |
| Braun et al., 2004              | Arthritis and Rheumatism               | Fibromyalgia and vitamin D deficiency: Is there a correlation                                                                                       | Meeting abstract               |
| Carvalho et al., 2018           | Isr Med Assoc J                        | Vitamin D Supplementation Seems to Improve Fibromyalgia Symptoms: Preliminary Results                                                               | No VAS, FIQ, BDI, SF-36 scores |
| Cassisi et al., 2013            | Clinical and Experimental Rheumatology | Complementary and alternative medicine in fibromyalgia: A practical clinical debate of agreements and contrasts                                     | Review article                 |
| Daniel et al., 2011             | Aust Fam Physician                     | Fibromyalgia--should we be testing and treating for vitamin D deficiency?                                                                           | Review article                 |
| Dogru et al., 2016              | Annals of the Rheumatic Diseases       | Effects of vitamin D therapy on quality of life in patients with fibromyalgia                                                                       | Meeting abstract               |

|                          |                                   |                                                                                                                                                              |                                |
|--------------------------|-----------------------------------|--------------------------------------------------------------------------------------------------------------------------------------------------------------|--------------------------------|
| Dogru et al., 2016       | Annals of the Rheumatic Diseases  | Effects of vitamin d therapy on quality of life in patients with fibromyalgia                                                                                | Poster abstract                |
| D'Souza et al., 2020     | Pain Med                          | Fibromyalgia Symptom Severity and Psychosocial Outcomes in Fibromyalgia Patients with Hypovitaminosis D: A Prospective Questionnaire Study                   | No VAS, FIQ, BDI, SF-36 scores |
| Ellis et al., 2018       | BMC Rheumatology                  | The role of vitamin D testing and replacement in fibromyalgia: A systematic literature review                                                                | Review article                 |
| Hsiao et al., 2015       | Pain Physician                    | Is serum hypovitaminosis D associated with chronic widespread pain including fibromyalgia? A meta-analysis of observational studies                          | Review article                 |
| Huisman et al., 2000     | Arthritis and Rheumatism          | Vitamin D in female systemic lupus erythematosus and fibromyalgia patients                                                                                   | Meeting abstract               |
| Ibáñez-Vera et al., 2018 | Apunts Medicina de l'Esport       | Therapeutic physical exercise and supplements to treat fibromyalgia                                                                                          | Review article                 |
| Jesus et al., 2013       | Current Pain and Headache Reports | The Role of Vitamin D in Pathophysiology and Treatment of Fibromyalgia                                                                                       | Review article                 |
| Kadayifci et al., 2022   | Nutrition Reviews                 | Review of nutritional approaches to fibromyalgia                                                                                                             | Review article                 |
| Karkeni et al., 2018     | Epigenetics                       | Vitamin D limits inflammation-linked microRNA expression in adipocytes in vitro and in vivo: A new mechanism for the regulation of inflammation by vitamin D | Gene study                     |
| Karras et al., 2016      | Nutrients                         | Vitamin D in fibromyalgia: A causative or confounding biological interplay?                                                                                  | Review article                 |
| Khan et al., 2016        | Rheumatology                      | Early replacement of vitamin D in vitamin D-deficient fibromyalgia patients improves reported pain and number of tender points                               | Meeting abstract               |
| Kvæl et al., 2021        | Nutrients                         | Use of Dietary Supplements and Perceived Knowledge among Adults Living with Fibromyalgia in Norway: A Cross-Sectional Study                                  | No VAS, FIQ, BDI, SF-36 scores |
| Lewis et al., 2011       | Journal of Musculoskeletal Pain   | Fibromyalgia syndrome and Vitamin D                                                                                                                          | Review article                 |
| Lombardo et al., 2022    | Nutrients                         | The Efficacy of Vitamin D Supplementation in the Treatment of Fibromyalgia Syndrome and Chronic Musculoskeletal Pain                                         | Review article                 |
| Ma et al., 2017          | DNA and Cell Biology              | Vitamin D supplementation prevents placental ischemia induced endothelial dysfunction by downregulating placental soluble FMS-like tyrosine kinase-1         | Animal study                   |

|                            |                                                             |                                                                                                                                                   |                                |
|----------------------------|-------------------------------------------------------------|---------------------------------------------------------------------------------------------------------------------------------------------------|--------------------------------|
| Makrani et al., 2017       | Korean Journal of Pain                                      | Vitamin D and fibromyalgia: A meta-analysis                                                                                                       | Review article                 |
| Maraslı et al., 2016       | International Journal of Rheumatic Diseases                 | Relationship between FokI polymorphism in the vitamin D receptor gene and fibromyalgia syndrome                                                   | Gene study                     |
| Martin et al., 1999        | Journal of Musculoskeletal Pain                             | Potential clinical benefit of nutritional supplements in the management of fibromyalgia                                                           | Review article                 |
| Martins et al., 2020       | Nutrition Reviews                                           | Is hypovitaminosis D associated with fibromyalgia? A systematic review                                                                            | Review article                 |
| Matthana et al., 2011      | Saudi Medical Journal                                       | The relation between vitamin D deficiency and fibromyalgia syndrome in women                                                                      | No VAS, FIQ, BDI, SF-36 scores |
| Matthana et al., 2012      | Saudi Medical Journal                                       | The relation between vitamin D deficiency and fibromyalgia syndrome Reply                                                                         | Letter to editor               |
| Miao et al., 2008          | Medical Acupuncture                                         | How do you treat fibromyalgia in your practice?                                                                                                   | Editorial                      |
| Moreno García et al., 2017 | Revista de la Sociedad Española del Dolor                   | Fibromyalgia and vitamin D levels                                                                                                                 | Editorial                      |
| Motley et al., 2010        | Primary Care - Clinics in Office Practice                   | Fibromyalgia: Helping your patient while maintaining your sanity                                                                                  | Review article                 |
| Mytton et al., 2007        | British Journal of General Practice                         | Vitamin D deficiency in multicultural primary care: A case series of 299 patients                                                                 | Case series                    |
| Nct et al., 2017           | <a href="https://clinicaltrials.gov">Clinicaltrials.gov</a> | Valuation of Efficacy and Safety of Vitamin D3 Use in 80 Women Diagnosed With Fibromyalgia. Using FIQ Score and VAS                               | Not RCT/cohort study           |
| Padidela et al., 2020      | Orphanet J Rare Dis                                         | The international X-linked hypophosphataemia (XLH) registry (NCT03193476): rationale for and description of an international, observational study | Review article                 |
| Pagliai et al., 2020       | Nutrients                                                   | Nutritional interventions in the management of fibromyalgia syndrome                                                                              | Review article                 |
| Parvez et al., 2022        | Cureus                                                      | Relationship Between Vitamin D Receptor Gene BsmI Polymorphism and Fibromyalgia Syndrome                                                          | Gene study                     |
| Plotnikoff et al., 2004    | Mayo Clinic Proceedings                                     | Vitamin D deficiency is not associated with nonspecific musculoskeletal pain syndromes including fibromyalgia - Reply                             | Letter to editor               |

|                            |                                                |                                                                                                                                                |                                |
|----------------------------|------------------------------------------------|------------------------------------------------------------------------------------------------------------------------------------------------|--------------------------------|
| Qu et al., 2022            | Expert Review of Clinical Pharmacology         | The efficacy of vitamin D in treatment of fibromyalgia: a meta-analysis of randomized controlled studies and systematic review                 | Review article                 |
| Rivera et al., 2009        | Clin Rheumatol                                 | Exp Resource utilisation and health care costs in patients diagnosed with fibromyalgia in Spain                                                | No VAS, FIQ, BDI, SF-36 scores |
| Rossi et al., 2015         | Clinical and Experimental Rheumatology         | Fibromyalgia and nutrition: what news?                                                                                                         | Review article                 |
| Scheuer et al., 2014       | International Journal of Clinical Rheumatology | Fibromyalgia: Could vitamin D help?                                                                                                            | Review article                 |
| Shanmuganandn et al., 2012 | Indian Journal of Rheumatology                 | Vitamin D deficiency: A 'Blindspot' for clinicians and a veritable 'Ray' of hope for patients with chronic musculoskeletal pains?              | Review article                 |
| Sicras-Mainar et al., 2009 | Arthritis Research & Therapy                   | Treating patients with fibromyalgia in primary care settings under routine medical practice: a claim database cost and burden of illness study | No VAS, FIQ, BDI, SF-36 scores |
| Siracusa et al., 2021      | International Journal of Molecular Sciences    | Fibromyalgia: Pathogenesis, mechanisms, diagnosis and treatment options update                                                                 | Review article                 |
| Sousa et al., 2022         | Annals of the Rheumatic Diseases               | VITAMIN D SUPPLEMENTATION in FIBROMYALGIA: A SYSTEMATIC REVIEW                                                                                 | Review article                 |
| Spaeth et al., 2007        | Journal of Musculoskeletal Pain                | Fibromyalgia syndrome review                                                                                                                   | Review article                 |
| Straube et al., 2009       | Pain                                           | Vitamin D and chronic pain                                                                                                                     | Review article                 |
| Straube et al., 2015       | Cochrane Database of Systematic Reviews        | Vitamin D for the treatment of chronic painful conditions in adults                                                                            | Review article                 |
| Talotta et al., 2017       | Clinical and Experimental Rheumatology         | One year in review 2017: Fibromyalgia                                                                                                          | Review article                 |
| Türkyilmaz et al., 2010    | Osteoporoz Dnyasından                          | The effects of bone mineral density and level of serum vitamin-D on pain and quality of life in fibromyalgia patients                          | Poster abstract                |
| Vasquez et al., 2016       | Nature Reviews Rheumatology                    | Neuroinflammation in fibromyalgia and CRPS is multifactorial                                                                                   | Review article                 |

|                            |                                     |                                                                                                                                                               |                                      |
|----------------------------|-------------------------------------|---------------------------------------------------------------------------------------------------------------------------------------------------------------|--------------------------------------|
| Veloza et al., 2008        | Bone                                | Vitamin D levels on patients with Fibromyalgia                                                                                                                | Not<br>RCT/cohort<br>study           |
| Venkatesan et al., 2022    | Current<br>rheumatology<br>reviews  | Efficacy of Vitamin D Supplementation in the Improvement of Clinical Status in Patients Diagnosed with Fibromyalgia Syndrome: A Systematic Review             | Review article                       |
| Vittorio et al., 2020      | Nutrients                           | Comparison between Acupuncture and Nutraceutical Treatment with Migratens (R) in Patients with Fibromyalgia Syndrome: A Prospective Randomized Clinical Trial | No VAS, FIQ,<br>BDI, SF-36<br>scores |
| Walitt et al., 2011        | J Rheumatol                         | The longitudinal outcome of fibromyalgia: a study of 1555 patients                                                                                            | No VAS, FIQ,<br>BDI, SF-36<br>scores |
| Warner et al., 2005        | Arthritis and<br>Rheumatism         | Treatment with vitamin D does not reduce pain in fibromyalgia patients with low vitamin D levels                                                              | Not<br>RCT/cohort<br>study           |
| Warner et al., 2008        | Journal of Clinical<br>Rheumatology | Diffuse musculoskeletal pain is not associated with low vitamin D levels or improved by treatment with vitamin D                                              | No VAS, FIQ,<br>BDI, SF-36<br>scores |
| Wu et al., 2016            | Pain Physician                      | Effect of Vitamin D Supplementation on Pain: A Systematic Review and Meta-analysis                                                                            | Review article                       |
| Wu et al., 2018            | Public Health<br>Nutrition          | The association between vitamin D concentration and pain: a systematic review and meta-analysis                                                               | Review article                       |
| Yong et al., 2017          | Clinical<br>Rheumatology            | Effect of vitamin D supplementation in chronic widespread pain: a systematic review and meta-analysis                                                         | Review article                       |
| Zabihiyeganeh et al., 2015 | Osteoporosis<br>International       | Effects of vitamin D on quality of life in fibromyalgia patients: A randomized controlled trial                                                               | Poster abstract                      |
| Zdebik et al., 2021        | Survey of<br>Ophthalmology          | Fibromyalgia syndrome and the eye-A review                                                                                                                    | Review article                       |
